# Supplementary material
Source: publisher figshare collection journal article supplement (https://brill.figshare.com/ndownloader/files/13902653)
Supplement: Supplementary file 1 [file 13902653]

Short Note

Antipredator behaviour of old-world tropical lizard, common agama *Agama agama*, in an urban environment

Peter Mikula<sup>1,\*</sup>, Emma Nelson<sup>2,3</sup>, Piotr Tryjanowski<sup>4</sup>, Tomáš Albrecht<sup>1,5</sup>

**Abstract.** Escape behaviour is a common antipredator strategy of lizards. Here, we studied the effect of several variables predicted to have a potential effect on escape behaviour of lizards. Specifically, we measured the effects of starting distance (SD), distance to cover, sex–age and the observer’s head orientation on flight initiation distance (FID) in the common agama *Agama agama*. Agamas were approached in urban localities in Limbe city, Cameroon, where they were habituated to the presence of humans. We found no association between FID and SD, but individuals closer to potential cover had shorter FID than individuals farther from a refuge. Juveniles escaped later than adults, but no significant differences were found in the FID between adult males and females. Head direction of the approaching observer had no effect on FID. This is, to the best of our knowledge, the first study investigating factors affecting FID in common agamas, extending our knowledge of risk-related behaviour in lizards of the Old World tropics.

*Keywords:* Africa, Cameroon, flight initiation distance, optimal escape theory.

1 - Department of Zoology, Faculty of Science, Charles University, Viničná 7, 128 43 Praha 2, Czech Republic

2 - School of Medicine, Ashton Street, University of Liverpool, L69 3GS, UK

3 - Department of Archaeology, Classics and Egyptology, 12-14 Abercromby Square, University of Liverpool, Liverpool, L69 7WZ, UK

4 - Institute of Zoology, Poznań University of Life Sciences, Wojska Polskiego 71 C, 60-625 Poznań, Poland

5 - Institute of Vertebrate Biology, Czech Academy of Sciences, Květná 8, 603 65 Brno, Czech Republic

\*Corresponding author; e-mail: petomikula158@gmail.com

## **Supplementary material**

**Table S1.** Primary data used in analysis of escape behaviour of common agama *Agama agama*, including flight initiation distance (FID) (m), starting distance (SD) (m), distance to the cover (close =  $\leq 1$  meter / far =  $> 1$  meter from the nearest cover), sex–age category (adult male / female, juvenile), and directness of approach (direct / averted).

| <b>Species</b>     | <b>FID</b> | <b>SD</b> | <b>Cover</b> | <b>Sex–Age</b> | <b>Approach</b> |
|--------------------|------------|-----------|--------------|----------------|-----------------|
| <i>Agama agama</i> | 2          | 22        | Far          | Juvenile       | Averted         |
| <i>Agama agama</i> | 2          | 20        | Close        | Male           | Averted         |
| <i>Agama agama</i> | 2          | 18        | Far          | Juvenile       | Averted         |
| <i>Agama agama</i> | 3          | 19        | Far          | Juvenile       | Averted         |
| <i>Agama agama</i> | 4          | 27        | Far          | Juvenile       | Averted         |
| <i>Agama agama</i> | 2          | 11        | Close        | Juvenile       | Averted         |
| <i>Agama agama</i> | 3          | 28        | Far          | Juvenile       | Averted         |
| <i>Agama agama</i> | 7          | 29        | Far          | Female         | Averted         |
| <i>Agama agama</i> | 2          | 17        | Close        | Female         | Averted         |
| <i>Agama agama</i> | 2          | 19        | Close        | Female         | Averted         |
| <i>Agama agama</i> | 2          | 10        | Close        | Male           | Averted         |
| <i>Agama agama</i> | 1          | 15        | Close        | Juvenile       | Averted         |
| <i>Agama agama</i> | 5          | 14        | Far          | Juvenile       | Averted         |
| <i>Agama agama</i> | 2          | 17        | Close        | Female         | Averted         |
| <i>Agama agama</i> | 3          | 17        | Close        | Female         | Averted         |
| <i>Agama agama</i> | 4          | 22        | Far          | Juvenile       | Averted         |
| <i>Agama agama</i> | 3          | 14        | Far          | Female         | Averted         |
| <i>Agama agama</i> | 3          | 10        | Close        | Female         | Averted         |
| <i>Agama agama</i> | 2          | 11        | Far          | Juvenile       | Averted         |
| <i>Agama agama</i> | 2          | 19        | Close        | Juvenile       | Averted         |
| <i>Agama agama</i> | 2          | 17        | Close        | Male           | Averted         |
| <i>Agama agama</i> | 6          | 12        | Far          | Female         | Averted         |
| <i>Agama agama</i> | 2          | 9         | Close        | Female         | Averted         |
| <i>Agama agama</i> | 2          | 20        | Close        | Juvenile       | Averted         |
| <i>Agama agama</i> | 3          | 14        | Close        | Female         | Averted         |
| <i>Agama agama</i> | 5          | 13        | Far          | Male           | Averted         |
| <i>Agama agama</i> | 7          | 21        | Far          | Female         | Averted         |
| <i>Agama agama</i> | 2          | 15        | Close        | Juvenile       | Averted         |
| <i>Agama agama</i> | 7          | 11        | Far          | Juvenile       | Averted         |
| <i>Agama agama</i> | 2          | 10        | Close        | Juvenile       | Averted         |
| <i>Agama agama</i> | 4          | 11        | Far          | Juvenile       | Averted         |
| <i>Agama agama</i> | 2          | 16        | Far          | Juvenile       | Averted         |
| <i>Agama agama</i> | 3          | 14        | Far          | Juvenile       | Averted         |
| <i>Agama agama</i> | 2          | 15        | Close        | Juvenile       | Averted         |
| <i>Agama agama</i> | 3          | 20        | Far          | Juvenile       | Averted         |
| <i>Agama agama</i> | 2          | 22        | Close        | Female         | Averted         |
| <i>Agama agama</i> | 2          | 24        | Close        | Juvenile       | Averted         |
| <i>Agama agama</i> | 2          | 26        | Close        | Juvenile       | Averted         |
| <i>Agama agama</i> | 9          | 30        | Far          | Male           | Direct          |
| <i>Agama agama</i> | 12         | 32        | Far          | Female         | Direct          |
| <i>Agama agama</i> | 8          | 20        | Far          | Juvenile       | Direct          |
| <i>Agama agama</i> | 6          | 30        | Far          | Male           | Direct          |
| <i>Agama agama</i> | 3          | 28        | Far          | Juvenile       | Direct          |
| <i>Agama agama</i> | 10         | 14        | Far          | Male           | Direct          |
| <i>Agama agama</i> | 12         | 18        | Far          | Female         | Direct          |
| <i>Agama agama</i> | 4          | 24        | Close        | Female         | Direct          |
| <i>Agama agama</i> | 4          | 20        | Far          | Female         | Direct          |
| <i>Agama agama</i> | 2          | 29        | Close        | Juvenile       | Direct          |
| <i>Agama agama</i> | 1          | 28        | Close        | Juvenile       | Direct          |
| <i>Agama agama</i> | 4          | 32        | Close        | Female         | Direct          |
| <i>Agama agama</i> | 7          | 19        | Far          | Female         | Direct          |
| <i>Agama agama</i> | 5          | 20        | Far          | Male           | Direct          |

|                    |   |    |       |          |        |
|--------------------|---|----|-------|----------|--------|
| <i>Agama agama</i> | 6 | 25 | Far   | Female   | Direct |
| <i>Agama agama</i> | 7 | 38 | Far   | Female   | Direct |
| <i>Agama agama</i> | 1 | 18 | Close | Juvenile | Direct |
| <i>Agama agama</i> | 6 | 21 | Far   | Male     | Direct |
| <i>Agama agama</i> | 2 | 15 | Close | Male     | Direct |
| <i>Agama agama</i> | 6 | 25 | Far   | Juvenile | Direct |
| <i>Agama agama</i> | 3 | 22 | Close | Male     | Direct |
| <i>Agama agama</i> | 2 | 15 | Far   | Juvenile | Direct |
| <i>Agama agama</i> | 7 | 17 | Far   | Juvenile | Direct |
| <i>Agama agama</i> | 2 | 17 | Close | Juvenile | Direct |
| <i>Agama agama</i> | 2 | 17 | Close | Female   | Direct |
| <i>Agama agama</i> | 4 | 15 | Far   | Juvenile | Direct |
| <i>Agama agama</i> | 3 | 20 | Far   | Juvenile | Direct |
| <i>Agama agama</i> | 2 | 20 | Close | Juvenile | Direct |
| <i>Agama agama</i> | 4 | 19 | Far   | Female   | Direct |
| <i>Agama agama</i> | 3 | 14 | Close | Female   | Direct |
| <i>Agama agama</i> | 2 | 16 | Close | Juvenile | Direct |
| <i>Agama agama</i> | 3 | 15 | Close | Juvenile | Direct |
| <i>Agama agama</i> | 3 | 19 | Close | Male     | Direct |

---
